# Supplementary material for: On the feasibility of producing hydrogen with net carbon fixation by the decomposition of vegetable and microalgal oils
Source: Royal Society of Chemistry journal article supplement (doi:10.1039/c2ee02709g), 2012-01-01
Supplement: c2ee02709g.pdf [file c2ee02709g.pdf]

## SUPPLEMENTARY INFORMATION

### On the feasibility of producing hydrogen with net carbon fixation by the decomposition of vegetable and microalgal oils

David P. Serrano, Javier Dufour, Diego Iribarren

#### Appendix A

Table A.1 gathers supporting data on the selected oils. Table A.2 shows the distribution of fatty acids for each of these oils according to literature data.<sup>35-38</sup>

**Table A.1.** Seed yield, extractable oil content and literature sources for the selected biomass feedstocks

|                                    | Sunflower | Soybean | Rapeseed | Jatropha | <i>B. braunii</i> | <i>C. vulgaris</i> |
|------------------------------------|-----------|---------|----------|----------|-------------------|--------------------|
| <b>Seed yield</b> (t/ha/year)      | 0.5-2.5   | 0.7-3.6 | 0.7-3.5  | 1.5-12.5 | 12.4-33.8         | 38.9-50.0          |
| <b>Extractable oil content</b> (%) | 40-48     | 18-20   | 30-40    | 34       | 14-53             | 12-27              |
| <b>References</b>                  | [24,25]   | [24,25] | [24-26]  | [27-29]  | [30-33]           | [31-34]            |

**Table A.2.** Fatty acid composition of the selected oils

| Fatty acid         | Formula                                        | Molecular weight | Mass percentage in: |             |              |              |                       |                        |
|--------------------|------------------------------------------------|------------------|---------------------|-------------|--------------|--------------|-----------------------|------------------------|
|                    |                                                |                  | Sunflower oil       | Soybean oil | Rapeseed oil | Jatropha oil | <i>B. braunii</i> oil | <i>C. vulgaris</i> oil |
| Lauric             | C <sub>12</sub> H <sub>24</sub> O <sub>2</sub> | 200              | -                   | -           | -            | -            | 2.30                  | 2.79                   |
| Myristic           | C <sub>14</sub> H <sub>28</sub> O <sub>2</sub> | 228              | -                   | -           | -            | -            | 2.87                  | 0.77                   |
| Palmitic           | C <sub>16</sub> H <sub>32</sub> O <sub>2</sub> | 256              | 6.40                | 10.97       | 5.10         | 12.94        | 40.58                 | 19.20                  |
| Palmitoleic        | C <sub>16</sub> H <sub>30</sub> O <sub>2</sub> | 254              | -                   | -           | -            | -            | -                     | 0.87                   |
| Margaric           | C <sub>17</sub> H <sub>34</sub> O <sub>2</sub> | 270              | -                   | -           | -            | -            | -                     | 4.19                   |
| Heptadecenoic      | C <sub>17</sub> H <sub>32</sub> O <sub>2</sub> | 268              | -                   | -           | -            | -            | -                     | 1.25                   |
| Stearic            | C <sub>18</sub> H <sub>36</sub> O <sub>2</sub> | 284              | 4.40                | 4.18        | 1.90         | 7.38         | 4.32                  | 14.60                  |
| Oleic              | C <sub>18</sub> H <sub>34</sub> O <sub>2</sub> | 282              | 26.40               | 21.41       | 59.60        | 45.30        | 22.28                 | 12.66                  |
| Linoleic           | C <sub>18</sub> H <sub>32</sub> O <sub>2</sub> | 280              | 61.70               | 54.83       | 20.30        | 34.38        | 14.45                 | 3.77                   |
| Linolenic          | C <sub>18</sub> H <sub>30</sub> O <sub>2</sub> | 278              | 0.80                | 7.83        | 8.64         | -            | 13.20                 | 26.09                  |
| Eicosanoic         | C <sub>20</sub> H <sub>40</sub> O <sub>2</sub> | 312              | 0.20                | 0.52        | 0.61         | -            | -                     | 0.36                   |
| Eicosenoic         | C <sub>20</sub> H <sub>38</sub> O <sub>2</sub> | 310              | 0.10                | 0.26        | 1.60         | -            | -                     | 4.09                   |
| Eicosadienoic      | C <sub>20</sub> H <sub>36</sub> O <sub>2</sub> | 308              | -                   | -           | -            | -            | -                     | 3.91                   |
| Dihomo-γ-linolenic | C <sub>20</sub> H <sub>34</sub> O <sub>2</sub> | 306              | -                   | -           | -            | -            | -                     | 3.30                   |
| Eicosapentaenoic   | C <sub>20</sub> H <sub>30</sub> O <sub>2</sub> | 302              | -                   | -           | -            | -            | -                     | 2.10                   |
| Behenic            | C <sub>22</sub> H <sub>44</sub> O <sub>2</sub> | 340              | -                   | -           | 0.25         | -            | -                     | -                      |
| Erucic             | C <sub>22</sub> H <sub>42</sub> O <sub>2</sub> | 338              | -                   | -           | 2.00         | -            | -                     | 0.05                   |

## **Appendix B**

Table B.1 details the computation of the decomposition enthalpy of the different fatty acids contained in the selected oils.

**Table B.1.** Decomposition enthalpy ( $\Delta H$ ) of the fatty acids considered in the study

| <b>Fatty acid</b>           | <b>Formula</b>    | <b>Molecular weight</b> | <b><math>\chi</math></b> | <b><math>\Delta H_f^0</math><br/>(kJ/mol)</b> | <b><math>\Delta H</math><br/>(kJ/mol)</b> | <b><math>\Delta H</math><br/>(MJ/kg)</b> |
|-----------------------------|-------------------|-------------------------|--------------------------|-----------------------------------------------|-------------------------------------------|------------------------------------------|
| Lauric                      | $C_{12}H_{24}O_2$ | 200                     | 6.77                     | -759.41                                       | 365.91                                    | 1.83                                     |
| Myristic                    | $C_{14}H_{28}O_2$ | 228                     | 7.77                     | -826.27                                       | 432.77                                    | 1.90                                     |
| Palmitic                    | $C_{16}H_{32}O_2$ | 256                     | 8.77                     | -897.27                                       | 503.77                                    | 1.97                                     |
| Palmitoleic                 | $C_{16}H_{30}O_2$ | 254                     | 8.42                     | -871.95                                       | 478.45                                    | 1.88                                     |
| Margaric                    | $C_{17}H_{34}O_2$ | 270                     | 9.475                    | -949.83                                       | 556.33                                    | 2.06                                     |
| Heptadecenoic               | $C_{17}H_{32}O_2$ | 268                     | 9.27                     | -934.33                                       | 540.83                                    | 2.02                                     |
| Stearic                     | $C_{18}H_{36}O_2$ | 284                     | 9.77                     | -972.43                                       | 578.93                                    | 2.04                                     |
| Oleic                       | $C_{18}H_{34}O_2$ | 282                     | 9.42                     | -945.65                                       | 552.15                                    | 1.96                                     |
| Linoleic                    | $C_{18}H_{32}O_2$ | 280                     | 9.07                     | -919.39                                       | 525.89                                    | 1.88                                     |
| Linolenic                   | $C_{18}H_{30}O_2$ | 278                     | 8.72                     | -893.63                                       | 500.13                                    | 1.80                                     |
| Eicosanoic                  | $C_{20}H_{40}O_2$ | 312                     | 10.77                    | -1,051.73                                     | 658.23                                    | 2.11                                     |
| Eicosenoic                  | $C_{20}H_{38}O_2$ | 310                     | 10.42                    | -1,023.50                                     | 630.00                                    | 2.03                                     |
| Eicosadienoic               | $C_{20}H_{36}O_2$ | 308                     | 10.275                   | -1,011.96                                     | 618.46                                    | 2.01                                     |
| Dihomo- $\gamma$ -linolenic | $C_{20}H_{34}O_2$ | 306                     | 9.925                    | -984.45                                       | 590.95                                    | 1.93                                     |
| Eicosapentaenoic            | $C_{20}H_{30}O_2$ | 302                     | 9.224                    | -930.88                                       | 537.38                                    | 1.78                                     |
| Behenic                     | $C_{22}H_{44}O_2$ | 340                     | 11.77                    | -1,135.17                                     | 741.67                                    | 2.18                                     |
| Erucic                      | $C_{22}H_{42}O_2$ | 338                     | 11.42                    | -1,105.50                                     | 712.00                                    | 2.11                                     |

## Appendix C

The computation of the energy and CO<sub>2</sub> balances for each of the three scenarios is detailed in Tables C.1 and C.2, respectively.

**Table C.1.** Estimation of the energy surpluses for each scenario (favourable energy surpluses in bold)

|                                             | SF2         | SB2         | RS2         | RS3         | J1          | J2           | BB1    | BB2         |
|---------------------------------------------|-------------|-------------|-------------|-------------|-------------|--------------|--------|-------------|
| <b>SCENARIO 1</b>                           |             |             |             |             |             |              |        |             |
| Available C energy (MJ/kg oil)              | 19.03       | 19.02       | 19.03       | 19.03       | 18.95       | 18.95        | 18.75  | 18.75       |
| Energy demand (MJ/kg oil)                   | 17.07       | 24.54       | 20.20       | 14.04       | 19.64       | 11.47        | 29.72  | 15.80       |
| SURPLUS:                                    |             |             |             |             |             |              |        |             |
| 1. Energy (MJ/kg oil)                       | <b>1.96</b> | -5.52       | -1.17       | <b>4.99</b> | -0.69       | <b>7.49</b>  | -10.96 | <b>2.95</b> |
| 2. Hydrogen (kg/kg oil)                     | 0.12        | 0.12        | 0.12        | 0.12        | 0.12        | 0.12         | 0.12   | 0.12        |
| <b>SCENARIO 2</b>                           |             |             |             |             |             |              |        |             |
| Available H <sub>2</sub> energy (MJ/kg oil) | 3.54        | 3.54        | 3.59        | 3.59        | 3.61        | 3.61         | 3.63   | 3.63        |
| Available C energy (MJ/kg oil)              | 19.03       | 19.02       | 19.03       | 19.03       | 18.95       | 18.95        | 18.75  | 18.75       |
| Energy demand (MJ/kg oil)                   | 17.07       | 24.54       | 20.20       | 14.04       | 19.64       | 11.47        | 29.72  | 15.80       |
| SURPLUS:                                    |             |             |             |             |             |              |        |             |
| 1. Energy (MJ/kg oil)                       | <b>5.50</b> | -1.99       | <b>2.42</b> | <b>8.58</b> | <b>2.93</b> | <b>11.10</b> | -7.33  | <b>6.58</b> |
| 2. Hydrogen (kg/kg oil)                     | 0.06        | 0.06        | 0.06        | 0.06        | 0.06        | 0.06         | 0.06   | 0.06        |
| <b>SCENARIO 3</b>                           |             |             |             |             |             |              |        |             |
| Available C energy (MJ/kg oil)              | 19.03       | 19.02       | 19.03       | 19.03       | 18.95       | 18.95        | 18.75  | 18.75       |
| Available H <sub>2</sub> energy (MJ/kg oil) | 0.00        | 5.52        | 1.17        | 0.00        | 0.69        | 0.00         | 7.26   | 0.00        |
| Energy demand (MJ/kg oil)                   | 17.07       | 24.54       | 20.20       | 14.04       | 19.64       | 11.47        | 29.72  | 15.80       |
| SURPLUS:                                    |             |             |             |             |             |              |        |             |
| 1. Energy (MJ/kg oil)                       | <b>1.96</b> | <b>0.00</b> | <b>0.00</b> | <b>4.99</b> | <b>0.00</b> | <b>7.49</b>  | -3.70  | <b>2.95</b> |
| 2. Hydrogen (kg/kg oil)                     | 0.12        | 0.03        | 0.10        | 0.12        | 0.11        | 0.12         | 0.00   | 0.12        |

**Table C.2.** Calculation of the CO<sub>2</sub> balances of those case studies with a favourable energy surplus (negative balances in bold)

|                                      | SF2          | SB2  | RS2          | RS3          | J1           | J2           | BB2          |
|--------------------------------------|--------------|------|--------------|--------------|--------------|--------------|--------------|
| <b>SCENARIO 1</b>                    |              |      |              |              |              |              |              |
| C-energy use (kg/kg oil)             | 0.65         | -    | -            | 0.53         | -            | 0.44         | 0.60         |
| C-fixed (kg/kg oil)                  | 0.07         | -    | -            | 0.19         | -            | 0.29         | 0.11         |
| CO <sub>2</sub> -input (kg/kg oil)   | 2.82         | -    | -            | 2.81         | -            | 2.81         | 2.79         |
| CO <sub>2</sub> -output (kg/kg oil)  | 2.54         | -    | -            | 2.12         | -            | 1.76         | 2.37         |
| CO <sub>2</sub> -balance (kg/kg oil) | <b>-0.27</b> | -    | -            | <b>-0.70</b> | -            | <b>-1.05</b> | <b>-0.41</b> |
| <b>SCENARIO 2</b>                    |              |      |              |              |              |              |              |
| C-energy use (kg/kg oil)             | 0.52         | -    | 0.63         | 0.40         | 0.61         | 0.30         | 0.46         |
| C-fixed (kg/kg oil)                  | 0.21         | -    | 0.09         | 0.33         | 0.11         | 0.42         | 0.25         |
| CO <sub>2</sub> -input (kg/kg oil)   | 2.82         | -    | 2.81         | 2.81         | 2.81         | 2.81         | 2.79         |
| CO <sub>2</sub> -output (kg/kg oil)  | 2.05         | -    | 2.48         | 1.62         | 2.40         | 1.26         | 1.87         |
| CO <sub>2</sub> -balance (kg/kg oil) | <b>-0.77</b> | -    | <b>-0.34</b> | <b>-1.20</b> | <b>-0.41</b> | <b>-1.55</b> | <b>-0.92</b> |
| <b>SCENARIO 3</b>                    |              |      |              |              |              |              |              |
| C-energy use (kg/kg oil)             | 0.65         | 0.72 | 0.72         | 0.53         | 0.72         | 0.44         | 0.60         |
| C-fixed (kg/kg oil)                  | 0.07         | 0.00 | 0.00         | 0.19         | 0.00         | 0.29         | 0.11         |
| CO <sub>2</sub> -input (kg/kg oil)   | 2.82         | 2.82 | 2.81         | 2.81         | 2.81         | 2.81         | 2.79         |
| CO <sub>2</sub> -output (kg/kg oil)  | 2.54         | 2.82 | 2.81         | 2.12         | 2.81         | 1.76         | 2.37         |
| CO <sub>2</sub> -balance (kg/kg oil) | <b>-0.27</b> | 0.00 | 0.00         | <b>-0.70</b> | 0.00         | <b>-1.05</b> | <b>-0.41</b> |

## Appendix D

Table D.1 details the computation of the energy balances for the decarbonization and transesterification systems in the context of the comparative analysis conducted in section 3.4.

**Table D.1.** Computation of the energy balances for the oil decarbonization and transesterification systems (favourable balances in bold)

|                                                             | SF1    | SF2          | SF3   | SB1    | SB2          | RS1    | RS2          | RS3          | J1           | J2           | BB1         | BB2          | CV1    | CV2    |
|-------------------------------------------------------------|--------|--------------|-------|--------|--------------|--------|--------------|--------------|--------------|--------------|-------------|--------------|--------|--------|
| <b>Energy input (MJ/kg oil)</b>                             |        |              |       |        |              |        |              |              |              |              |             |              |        |        |
| Cultivation                                                 | 100.00 | 10.67        | 38.00 | 107.14 | 15.16        | 46.43  | 11.49        | 5.33         | 12.46        | 4.29         | 23.19       | 9.28         | 33.70  | 6.60   |
| Extraction                                                  | 3.15   | 3.15         | 3.15  | 5.90   | 5.90         | 5.42   | 5.42         | 5.42         | 3.81         | 3.81         | 3.17        | 3.17         | 92.98  | 42.21  |
| Decomposition                                               | 3.26   | 3.26         | 3.26  | 3.48   | 3.48         | 3.29   | 3.29         | 3.29         | 3.38         | 3.38         | 3.36        | 3.36         | 3.36   | 3.36   |
| Refining and transesterification                            | 1.90   | 1.90         | 1.90  | 1.90   | 1.90         | 1.90   | 1.90         | 1.90         | 1.90         | 1.90         | 0.85        | 0.85         | 0.85   | 0.85   |
| <i>Total energy demand<br/>(decarbonization system)</i>     | 106.41 | 17.07        | 44.41 | 116.52 | 24.54        | 55.13  | 20.20        | 14.04        | 19.64        | 11.47        | 29.72       | 15.80        | 130.04 | 52.16  |
| <i>Total energy demand<br/>(transesterification system)</i> | 105.05 | 15.71        | 43.05 | 114.94 | 22.96        | 53.74  | 18.81        | 12.65        | 18.16        | 9.99         | 27.21       | 13.29        | 127.53 | 49.65  |
| <b>Energy output (MJ/kg oil)</b>                            |        |              |       |        |              |        |              |              |              |              |             |              |        |        |
| <i>Carbon and hydrogen<br/>(decarbonization system)</i>     | 37.97  | 37.97        | 37.97 | 37.92  | 37.92        | 38.15  | 38.15        | 38.15        | 38.14        | 38.14        | 37.97       | 37.97        | 37.97  | 37.97  |
| <i>Biodiesel<br/>(transesterification system)</i>           | 37.63  | 37.63        | 37.63 | 37.63  | 37.63        | 37.63  | 37.63        | 37.63        | 37.63        | 37.63        | 36.19       | 36.19        | 36.19  | 36.19  |
| <b>Energy surplus (MJ/kg oil)</b>                           |        |              |       |        |              |        |              |              |              |              |             |              |        |        |
| <i>Decarbonization system</i>                               | -68.44 | <b>20.89</b> | -6.44 | -78.60 | <b>13.38</b> | -16.99 | <b>17.95</b> | <b>24.11</b> | <b>18.50</b> | <b>26.67</b> | <b>8.26</b> | <b>22.17</b> | -92.07 | -14.20 |
| <i>Transesterification system</i>                           | -67.41 | <b>21.92</b> | -5.41 | -77.30 | <b>14.67</b> | -16.11 | <b>18.83</b> | <b>24.99</b> | <b>19.47</b> | <b>27.65</b> | <b>8.98</b> | <b>22.90</b> | -91.34 | -13.46 |
